# Supplementary material for: Intermolecular Failure of L-type Ca2+ Channel and Ryanodine Receptor Signaling in Hypertrophy
Source: PLOS journal article supplement (doi:10.1371/journal.pbio.0050021), 2007-01-05
Supplement: S1 (10.1371/journal.pbio.0050021.s001) [file journal.pbio.0050021.s001]

**Suppl.Table 1. *In Vivo* Hemodynamic and Echocardiographic Measurements**

|                             | Con (n=8)   | CHT (n=7)    | DHT (n=7)     |
|-----------------------------|-------------|--------------|---------------|
| HR (beats/min)              | 348 ± 17    | 326 ± 23     | 345 ± 21      |
| BW (g)                      | 424 ± 9     | 401 ± 14     | 436 ± 23      |
| LV mass (g)                 | 0.97 ± 0.03 | 1.35 ± 0.07* | 1.46 ± 0.078* |
| LV mass/BW (g/kg)           | 2.29 ± 0.07 | 3.4 ± 0.26*  | 3.4 ± 0.25*   |
| LVD <sub>d</sub> (mm)       | 7.15 ± 0.21 | 6.83 ± 0.14  | 7.9 ± 0.24*   |
| LVD <sub>s</sub> (mm)       | 3.6 ± 0.18  | 3.13 ± 0.14  | 5.26 ± 0.16*  |
| FS%                         | 50 ± 2      | 56 ± 2*      | 33 ± 2*       |
| AW <sub>d</sub> (mm)        | 2.06 ± 0.10 | 2.93 ± 0.21* | 2.86 ± 0.22*  |
| PW <sub>d</sub> (mm)        | 2.05 ± 0.09 | 2.94 ± 0.21* | 2.94 ± 0.14*  |
| RWT                         | 0.58 ± 0.03 | 0.86 ± 0.06* | 0.75 ± 0.06*  |
| LVSP (mm Hg)                | 106 ± 2     | 191 ± 4*     | 186 ± 5*      |
| LVdevP/g (mm Hg/g)          | 100 ± 3     | 130 ± 7*     | 119 ± 7*      |
| LV $dP/dt_{\max}$ (mm Hg/s) | 7532 ± 228  | 7862 ± 251   | 7263 ± 115    |
| LV $dP/dt_{\min}$ (mm Hg/s) | 4867 ± 211  | 4987 ± 192   | 5248 ± 210    |
| LVEDP (mm Hg)               | 5.1 ± 0.3   | 11.4 ± 0.4*  | 13.3 ± 0.5*   |

Con, Control; CHT, compensated hypertrophy; DHT, decompensated hypertrophy; HR, heart rate; BW, body weight; LV mass, left ventricular mass; LVD<sub>d</sub>, left ventricular diastolic diameter; LVD<sub>s</sub>, left ventricular systolic diameter; FS, fractional shortening; AW<sub>d</sub>, anterior wall thickness; PW<sub>d</sub>, posterior wall thickness; RWT, relative wall thickness calculated as the ratio of 2×posterior wall thickness and LVD<sub>d</sub>; LVSP, left ventricular systolic pressure; LVdevP/g, left ventricular developed pressure per g LV; LVEDP, left ventricular end diastolic pressure. \* $P < 0.05$  vs Control.
