# Supplementary figures and images for: Intermolecular Failure of L-type Ca2+ Channel and Ryanodine Receptor Signaling in Hypertrophy
Source: PLOS journal article supplement (doi:10.1371/journal.pbio.0050021), 2007-01-05

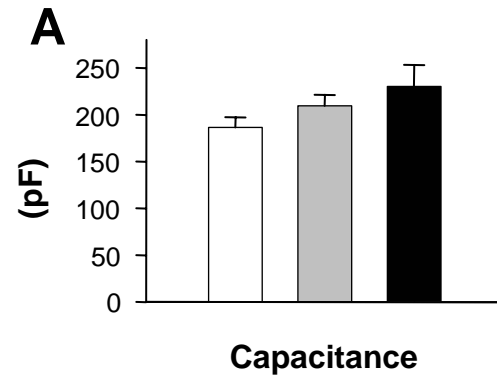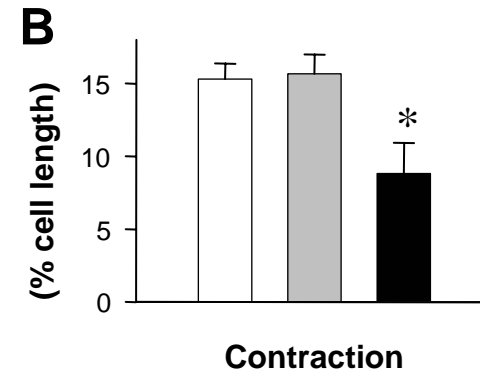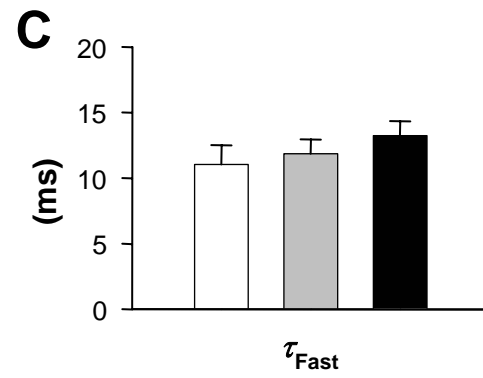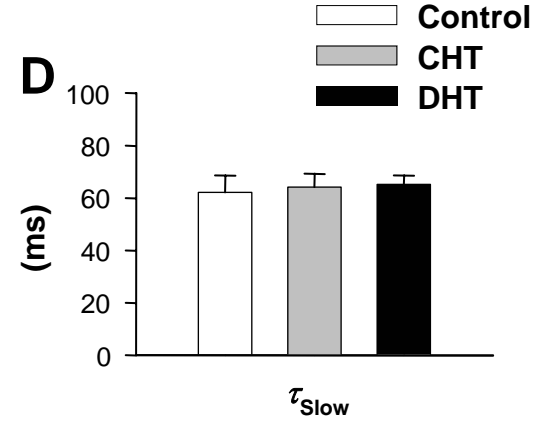

Supplement: S1 (10.1371/journal.pbio.0050021.s001) [file journal.pbio.0050021.s001]
